# Supplementary material for: The evolution and adoption of equity crowdfunding: entrepreneur and investor entry into a new market
Source: Springer Nature journal article supplement (doi:10.1007/s11187-018-0009-5), 2018-02-28
Supplement: MOESM1 [file 15498982]

**The evolution and adoption of equity crowdfunding: Entrepreneur and investor entry into a new market**

**Small Business Economics**

**Saul Estrin**

**London School of Economics, UK**

**[s.estrin@lse.ac.uk](mailto:s.estrin@lse.ac.uk)**

**Daniel Gozman**

**University of Sydney and Henley Business School, University of Reading, UK**

**Susanna Khavul**

**Lucas College and Graduate School of Business, San Jose State University, US and London School of Economics, UK**

## Appendix A: Data and evidence about UK Equity Crowdfunding

Table A.1. Description of the UK Equity Crowdfunding Sector

| Name                       | Active | Industry Focus | Global Launch | UK Operations Launch | Equity Operations Launch | Projects Funded | Total Equity Raised (£M) | Total Monies Raised (£M) | Registered Users | Avg. No. Investors per Funded Project | Average Funding Round Size (£) | Average Investment Size (£) | Secondary Market | International Operations            |
|----------------------------|--------|----------------|---------------|----------------------|--------------------------|-----------------|--------------------------|--------------------------|------------------|---------------------------------------|--------------------------------|-----------------------------|------------------|-------------------------------------|
| AngelList                  | Y      | General        | 2010          | 2015                 | 2015                     | 6               | 1,44                     | 1.44                     |                  |                                       | 240,000                        |                             | N                | UK                                  |
| Angels Den                 | Y      | General        | 2013          | 2013                 | 2013                     | 60*             | 11*                      | 19.8                     | 13.000*          |                                       | 190,000*                       | 20.000*                     | N                | Mexico                              |
| Crowdcube                  | Y      | General        | 2011          | 2011                 |                          | 531             | 315                      | 315                      | 405.233          | 238                                   | 642,000                        | 1,789                       | N                |                                     |
| Funding Tree               | N      | General        | 2014          | 2014                 |                          | 3               |                          | 1                        |                  |                                       | 350,000                        |                             | N                |                                     |
| Invesdor                   | Y      | General        | 2012          | 2016                 | 2016                     | 5               |                          | 0.58                     |                  |                                       | 116,200                        |                             | N                | United Kingdom, Denmark, Norway     |
| Property Moose             | Y      | Real Estate    | 2014          | 2014                 |                          | 90              | 10,3                     | 10.3                     | 23.300           |                                       | 114,000                        |                             | Y                |                                     |
| Property Partner           | Y      | Real Estate    | 2014          | 2014                 | 2014                     | 300             | 43,0                     | 43.0                     | 9.000            |                                       | 143,000                        |                             | Y                |                                     |
| Seedrs                     | Y      | General        | 2012          | 2012                 | 2012                     | 375             | 171*                     | 171*                     |                  | 203°                                  |                                | 1,902°                      | Y                | Portugal, USA, Netherlands, Germany |
| Trillion Fund              | N      | Renewables     | 2015          | 2015                 |                          | 100             |                          | 4                        |                  |                                       | 40,000                         |                             | N                |                                     |
| Venture Founders Syndicate | Y      | General        | 2014          | 2014                 | 2014                     | 22              | 42.6                     | 42.6                     |                  | 42,0                                  | 1,936,000                      | 46,095                      | N                |                                     |
| Room                       | Y      | General        | 2013          | 2013                 | 2013                     | 100             | 86.3                     | 86.3                     |                  |                                       | 860,000                        | 15,000                      | N                |                                     |
| Crowd for Angels           | Y      | General        | 2012          | 2012                 |                          |                 |                          |                          |                  |                                       |                                |                             | N                |                                     |
| Eureeca                    | Y      | General        | 2013          | 2015                 | 2015                     |                 |                          |                          | 14.100           |                                       |                                |                             | N                | UK, Malaysia, Netherlands           |

*Notes: Industry Focus: (2017) Focus on particular industry projects. Global Launch: Year operations were launched in country of origin (not company foundation). UK Operations launch: Year operations were launched in the UK (not company foundation). Equity Operations Launch: Year UK equity crowdfunding operations were launched. Projects Funded: Number of projects that succeed in completing funding round (since launch). Total Equity Raised (£M): Total Equity raised for projects (since launch). Total Monies Raised (£M): Total Funding raised for projects (since launch). Includes forms other than equity. For only-equity platforms this is assumed to be equal with total equity raised. Registered Users: Number of registered users on the platform. Avg. No. Investors per Funded Project: Average number of investors funding projects that successfully completed funding round (since launch). Average Funding Round Size (£): Average total amount (all kind of funding) requested by projects allowed to pitch on the platform (since launch). Average Investment Size (£): Average amount invested by single investor in funding round (all kind of funding, since launch). Secondary Market: Presence of a platform integrated secondary market for investments (Y/N). International Operations: Countries where the platform has established crowdfunding operations (other than country of origin).*

**Table A.2.** Number of Pitches by Sector

| Year         | Primary | Secondary | Tertiary | Total |
|--------------|---------|-----------|----------|-------|
| 2011         | 0       | 2         | 8        | 10    |
| 2012         | 0       | 7         | 24       | 31    |
| 2013         | 9       | 22        | 67       | 98    |
| 2014         | 3       | 64        | 161      | 228   |
| 2015         | 3       | 91        | 229      | 323   |
| 2016         | 1       | 87        | 187      | 275   |
| 2017*        | 0       | 36        | 44       | 80    |
| <b>Total</b> | 16      | 309       | 720      | 1045  |

\*2017 data covers first five months for Crowdcube, first quarter for Seedrs and first two quarters for Syndicate Room.

**Table A.3.** Proportion of Pitches Belonging to Now Failed Companies

| Year of funding | Proportion of Failures |
|-----------------|------------------------|
| 2011            | 40%                    |
| 2012            | 32%                    |
| 2013            | 29%                    |
| 2014            | 11%                    |
| 2015            | 4%                     |
| 2016            | 1%                     |
| 2017            | 0%                     |
| <b>Total</b>    | 8%                     |

**Fig.A.1** Geographical deepening of Equity Crowdfunding Network in the UK

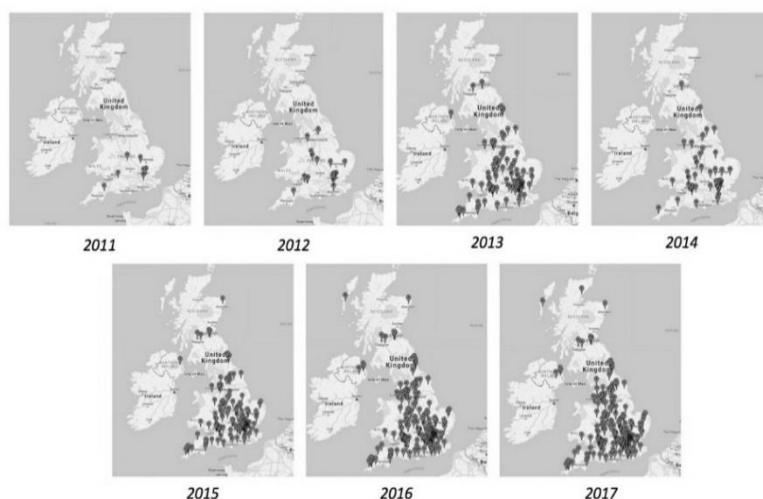

Source: Estrin, S., Gozman, D., and Khavul, S. (2017). The evolution and adoption of equity crowdfunding: Entrepreneur and investor entry into a new market. *Small Business Economics*, forthcoming.

Figure A2: Deepening of equity crowdfunding social networks

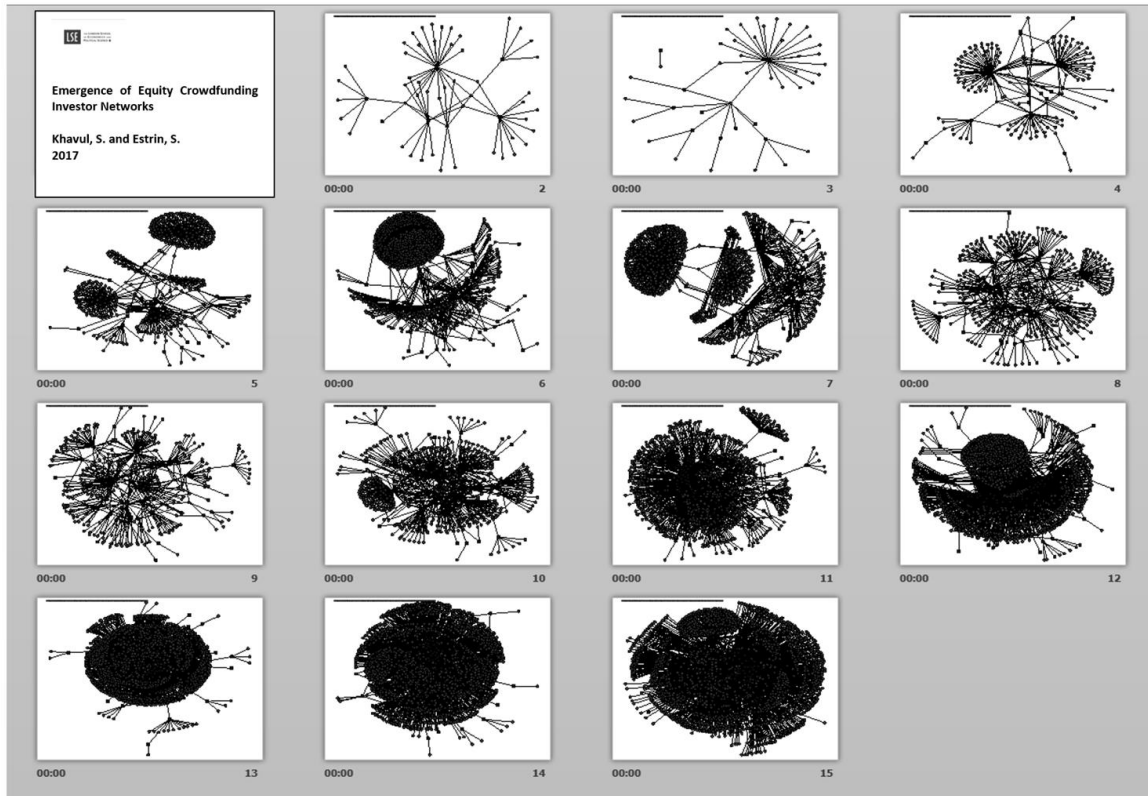

▲ Source: Khavul, S. and Estrin, S. (2017). Emergence of Equity Crowdfunding Investor Networks. Copyright: Khavul and Estrin 2017.
